---

## Effect of permanent sea ice cover and different nutrient regimes on the phytoplankton succession of fjords of the Vestfold Hills Oasis, eastern Antarctica

Andrew McMinn, Nerida Bleakley<sup>1</sup>, Kerrie Steinburner, Donna Roberts and Louise Trenerry

*Institute of Antarctic and Southern Ocean Studies, University of Tasmania, Box 252–77, Hobart 7001, Tasmania and <sup>1</sup>Centre for Palynology and Palaeoecology, Department of Geography and Environmental Sciences, Monash University, Clayton, Victoria 3168, Australia*

---

**Abstract.** Early season phytoplankton communities in both Omega and Taynaya Bays are characterized by diatoms sedimenting out of the overlying sea ice. Initial nitrate, phosphate and silicate levels are high and the bay waters are covered with ice and well mixed. In Taynaya Bay the ice cover is retained throughout the season while Omega Bay is ice free for 6–8 weeks. After ice break out in Omega Bay, the phytoplankton community changes from one dominated by diatoms to one dominated by the phytoflagellates, *Pyramimonas* spp., *Cryptomonas* sp. and *Gymnodinium* sp. In Taynaya Bay the ice remained and even though phytoflagellates became more common, diatoms still dominated. These differences in community composition result from differences in light climate, extent of stratification and nutrient levels.

---

### Introduction

Coastal Antarctic environments are covered by sea ice for up to 11 months of every year so conditions for phytoplankton blooms are usually confined to a mere 6–8 weeks. Phytoplankton biomass beneath the coastal fast ice cover is usually very low and even in spring, it is mostly derived from cells sedimenting out of the melting sea ice (McMinn, 1996). While these cells may contribute to the ice edge phytoplankton blooms further offshore (Nelson and Smith, 1986; Nelson *et al.*, 1987), they make little contribution to blooms in coastal areas (McMinn and Hodgson, 1993; McMinn 1996).

Seas around Antarctica are characterized by high nutrient concentrations but low phytoplankton biomass (Knox, 1994). Only in the centre of intense ice edge blooms, or at the surface of strongly stratified fjords (McMinn *et al.*, 1995), have nutrients been seen to be depleted to anything like limiting levels. It has been suggested that this paradox can be explained by either iron limitation (Martin *et al.*, 1990), or by low light levels and deep mixing (Nelson and Smith, 1991). In coastal environments iron deficiency is unlikely to contribute to the high nutrient concentrations owing to the proximity of continental sources. Recent studies of Ellis Fjord (McMinn and Hodgson, 1993; McMinn *et al.*, 1995; McMinn, 1996) showed that nutrient depletion after water column stratification was likely to be the main factor driving the local species succession. In this investigation, we compare the species succession in two fjords with quite different hydrologies, and investigate the various environmental parameters that are likely to have determined the major changes in species composition.

## Method

Long Fjord and Taynaya Bay are both located in the northern Vestfold Hills, eastern Antarctica (Figure 1), ~10 km from Davis Station. Omega Bay is a small, roughly circular embayment (~1 km diameter) on Partizan Island in Long Fjord. It is separated from the rest of the fjord by a shallow sill which in winter becomes blocked by sea ice. The bay is 7 m deep but is permanently stratified and anoxic (i.e. with an oxycline) beneath 5 m. Taynaya Bay is a much larger bay, located well to the west of the ice cap and connected to the sea by a narrow channel, the Barker Channel (Figure 1). This bay is up to 45 m deep but is also permanently stratified and anoxic (i.e. with an oxycline) beneath 25 m. A major difference between the two bays is the temporal extent of ice cover. Omega Bay becomes ice free for up to 8 weeks each year while most of Taynaya Bay retains an ice cover throughout the year. The permanently stratified bottom waters of both bays has allowed detailed examination of recent climate change from sediment cores (McMinn *et al.*, 1994, 1997).

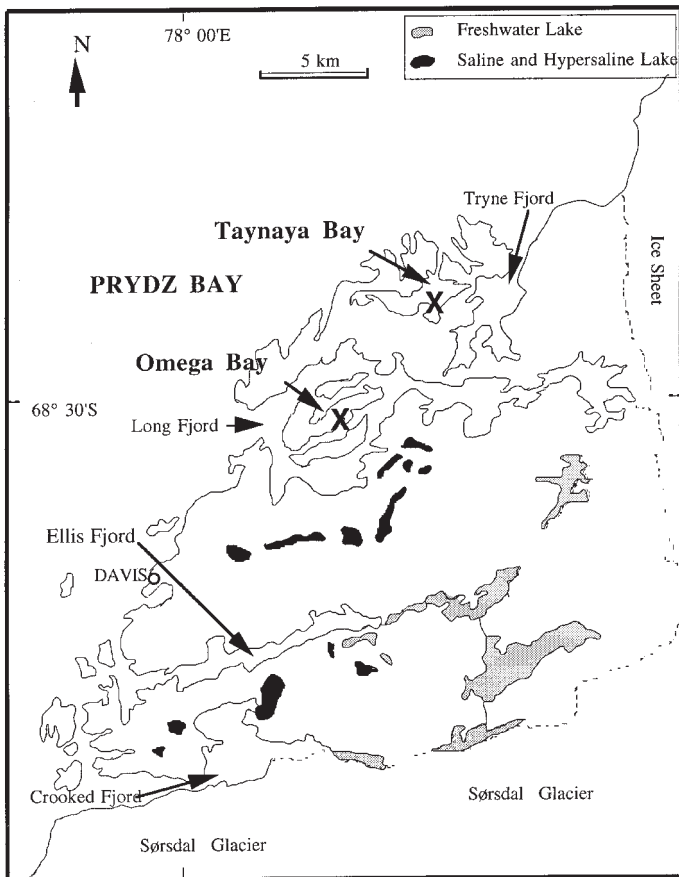

**Fig. 1.** Map of the Vestfold Hills showing the location of Taynaya Bay, Omega Bay and Long Fjord.

All sampling, which was through holes in the sea ice produced by a Jiffey Drill, occurred between 6 November 1996 and 3 February 1997. Water samples were collected in a 1 l Kemmerer Bottle. Salinity and temperature were measured with a WTW conductivity meter. Underwater light measurements were made with a Biospherical  $4\pi$  PAR quantum radiometer. One litre water samples for chlorophyll analysis were filtered onto 42 mm diameter Whatman GF/F filters, extracted for 12 h in 90% acetone and the absorbances then measured on a UV-VIS spectrophotometer following the method of Strickland and Parsons (Strickland and Parsons, 1972). Samples for species analysis were settled in Utermohl settling chambers and a minimum of 400 cells counted. Nutrients samples were frozen after collection and then measured on an Alpkem Autoanalyser following standard methods (Alpkem, 1992). Samples for diatom analysis were left in 30%  $\text{H}_2\text{O}_2$  for 3 days, washed repeatedly and then mounted in Norland Optical Adhesive. All sampling was from above the permanent oxyclines.

## Results

### *Temperature*

The water column in Omega Bay remained well mixed with a uniform temperature of  $-3^\circ\text{C}$  at each depth up to 29 December, 1996. After that date the surface waters became progressively warmer, reaching a maximum temperature of  $6.7^\circ\text{C}$ , while the temperature at 5 m reached only  $1.1^\circ\text{C}$  (Figure 2a).

In Taynaya Bay the water column remained well mixed until 5 December with temperatures of  $-2.0^\circ\text{C}$  at all depths. Surface waters reached a maximum temperature of  $-0.1^\circ\text{C}$  on 3 February while at 10 m, temperatures reached only  $-1.6^\circ\text{C}$  (Figure 2b).

### *Salinity*

Salinities above the oxycline (at 5 m) in Omega Bay were 53.2 pss until 12 December. After that date, salinities at 2 m decreased to a minimum of 25.7 pss on 3 February. Below this depth, salinities remained  $>52$  pss (Figure 3a).

In Taynaya Bay surface salinities at the beginning of the season were 34.9 pss; these had decreased to 32.0 pss by 3 February. Salinities at 10 m remained in a tight band between 35.4 and 35.9 pss throughout the season (Figure 3b).

### *Nutrients*

*Omega Bay.* Initial nitrate (i.e. nitrate + nitrite) concentrations were  $8.4 \text{ mmol m}^{-3}$  at 2.0 m and  $9.8 \text{ mmol m}^{-3}$  at 5.0 m (Figure 4). These decreased uniformly through the season to minima of  $0.18 \text{ mmol m}^{-3}$  at 2.0 m and  $0.15 \text{ mmol m}^{-3}$  at 5.0 m on 3 February. Early season (19 November) silicate concentrations were  $86.3 \text{ mmol m}^{-3}$  at 2.0 m and  $87.6 \text{ mmol m}^{-3}$  at 5.0 m (Figure 4). These had decreased to  $24.6 \text{ mmol m}^{-3}$  at 2.0 m and  $42.2 \text{ mmol m}^{-3}$  at 5 m by 3 February. Initial phosphate concentrations were  $3.1 \text{ mmol m}^{-3}$  at 2.0 m and  $3.7 \text{ mmol m}^{-3}$  at 5.0 m. These had decreased to  $0.46 \text{ mmol m}^{-3}$  at 2.0 m and  $1.5 \text{ mmol m}^{-3}$  at

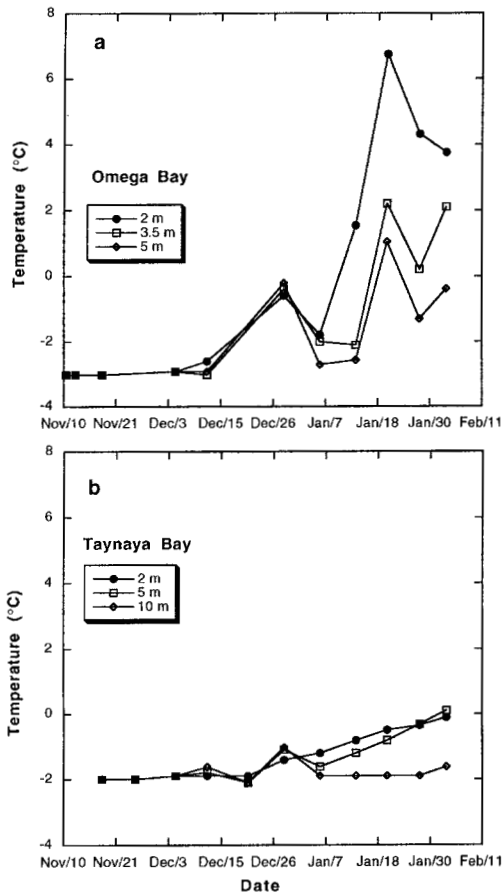

**Fig. 2.** Temperature profiles of Omega Bay (a) and Taynaya Bay (b).

5.0 m by 3 February. Unlike the nitrate (N) concentrations, the silicate (Si) and phosphate (P) concentrations showed a small rise in early January, followed by a continued fall.

The N:P ratio remained relatively constant from November to early January and then dropped sharply (Figure 5). The N:Si ratio, however, followed a more variable path, commencing in mid-November at ~0.8, rising to >1.4 by late November, dropping to <0.1 in mid-December and then rising again to >1.2 towards the end of January (Figure 5).

*Taynaya Bay.* Initial nitrate concentrations were 16.2 mmol m<sup>-3</sup> at 2.0 m and 23.8 mmol m<sup>-3</sup> at 10 m (Figure 4). These had decreased to 0.27 mmol m<sup>-3</sup> at 2.0 m and 2.48 mmol m<sup>-3</sup> at 10 m by 3 February. Silicate concentrations were initially 35.4 mmol m<sup>-3</sup> at 2.0 m and 49.0 mmol m<sup>-3</sup> at 10.0 m. These decreased to 10.0 mmol m<sup>-3</sup> at 2.0 m and 13.4 mmol m<sup>-3</sup> at 10.0 m. Phosphate concentrations were initially

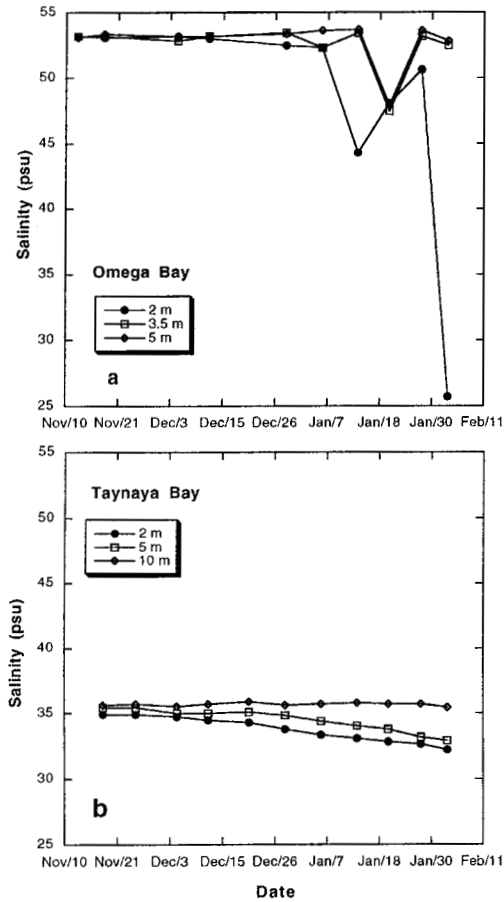

**Fig. 3.** Salinity profiles of Omega Bay (a) and Taynaya Bay (b).

1.5 mmol m<sup>-3</sup> at 2.0 m and 2.2 mmol m<sup>-3</sup> at 10 m. These had decreased to 0.29 mmol m<sup>-3</sup> at 2.0 m and 0. mmol m<sup>-3</sup> at 10 m by 3 February. There was a reasonably well defined rise in both nitrate and silicate concentrations in early January; this trend was less clear in the phosphate data (Figure 4).

N:P ratios remained at ~12 until early January from which date they dropped sharply and then remained at <1 until the end of the season. N:Si ratios showed a similar trend to the N:P ratios, with initial values constant at ~0.5 until early January, followed by a sharp drop to values of <0.05 (Figure 5).

### Pigments

*Omega Bay.* Chlorophyll *a* concentration at the beginning of the season, i.e. 13 November, was extremely low, with values of only 0.04 mg Chl *a* m<sup>-3</sup> at 2 m and

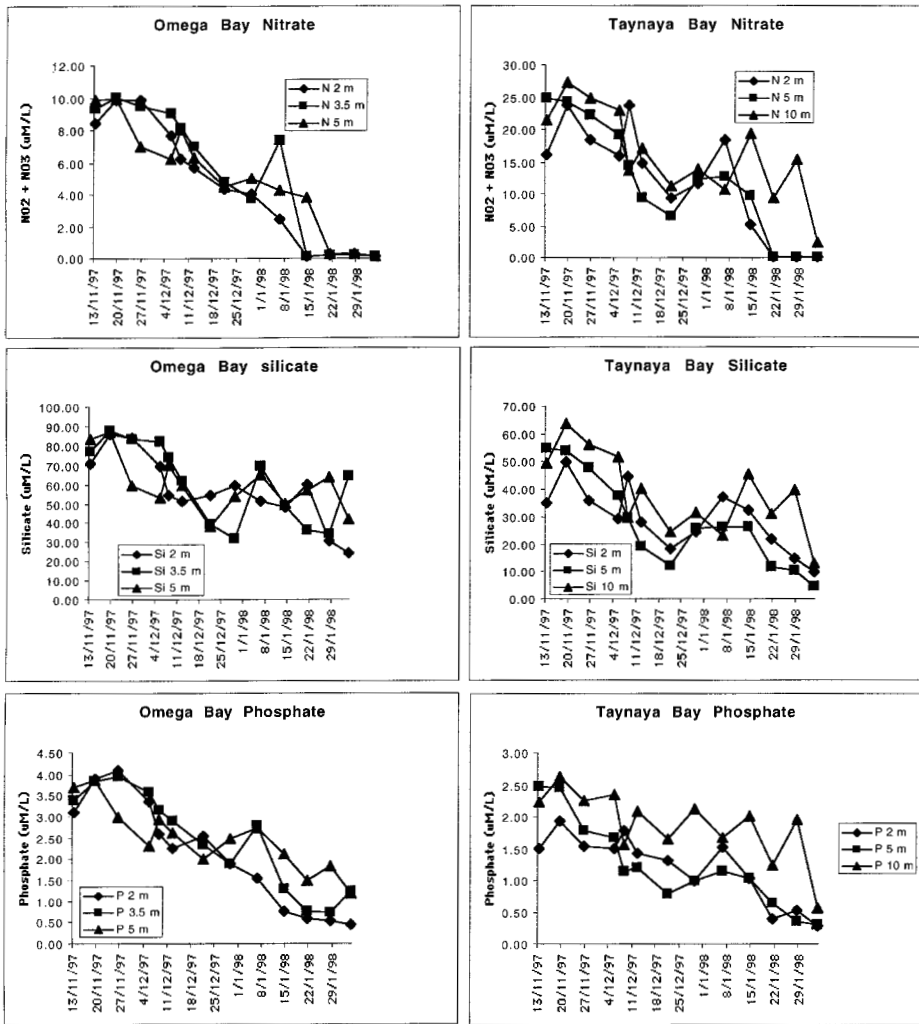

**Fig. 4.** Concentration of nitrate (nitrate + nitrite), silicate and phosphate at 2 m, 3.5 m and 5 m in Omega Bay and 2 m, 5 m and 10 m in Taynaya Bay.

0.0003 mg Chl *a* m<sup>-3</sup> at 5 m. This increased to a maximum of 2.20 mg Chl *a* m<sup>-3</sup> at 2.0 m and 0.39 mg Chl *a* m<sup>-3</sup> at 5 m on 8 December and subsequently declined. There was a late increase to 1.90 mg Chl *a* m<sup>-3</sup> at 2.0 m and 2.40 mg Chl *a* m<sup>-3</sup> at 5 m on 6 January (Figure 6). Chlorophyll *c* concentration showed a similar distribution to chlorophyll *a*, although there was no late season increase. Chlorophyll *b* concentration was mostly low throughout the season but there was a late season increase coincident with the increase in chlorophyll *a* (Figure 6).

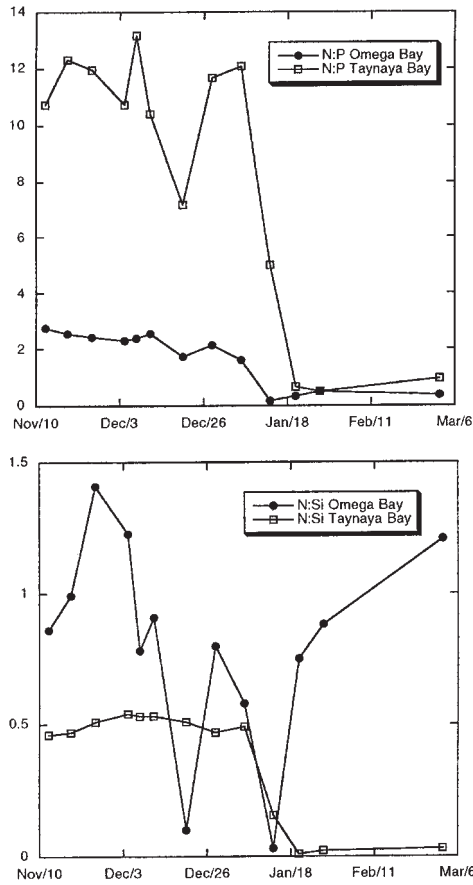

**Fig. 5.** N:P ratios at 2 m in Omega and Taynaya Bays, N:Si ratios at 2 m in Omega and Taynaya Bays.

*Taynaya Bay.* Chlorophyll *a* concentration reached a peak on 26 November, with values of  $1.70 \text{ mg Chl } a \text{ m}^{-3}$  at 2.0 m and  $0.22 \text{ mg Chl } a \text{ m}^{-3}$  at 10 m. Chlorophyll *c* distribution followed that of chlorophyll *a*. Chlorophyll *b* remained low throughout the season (Figure 6).

### *Species distribution*

*Omega Bay.* Cell numbers from Omega Bay were integrated to a depth of 5 m. There were two peaks in cell abundance, one on 5 December ( $99 \times 10^9 \text{ cells m}^{-2}$ ) and a second ( $53 \times 10^9 \text{ cells m}^{-2}$ ) on 21 January. These corresponded to maximum unintegrated cell abundances of  $4.7 \times 10^6 \text{ cells l}^{-1}$  and  $1.6 \times 10^6 \text{ cells l}^{-1}$  from the same dates both at 5 m (Figure 7).

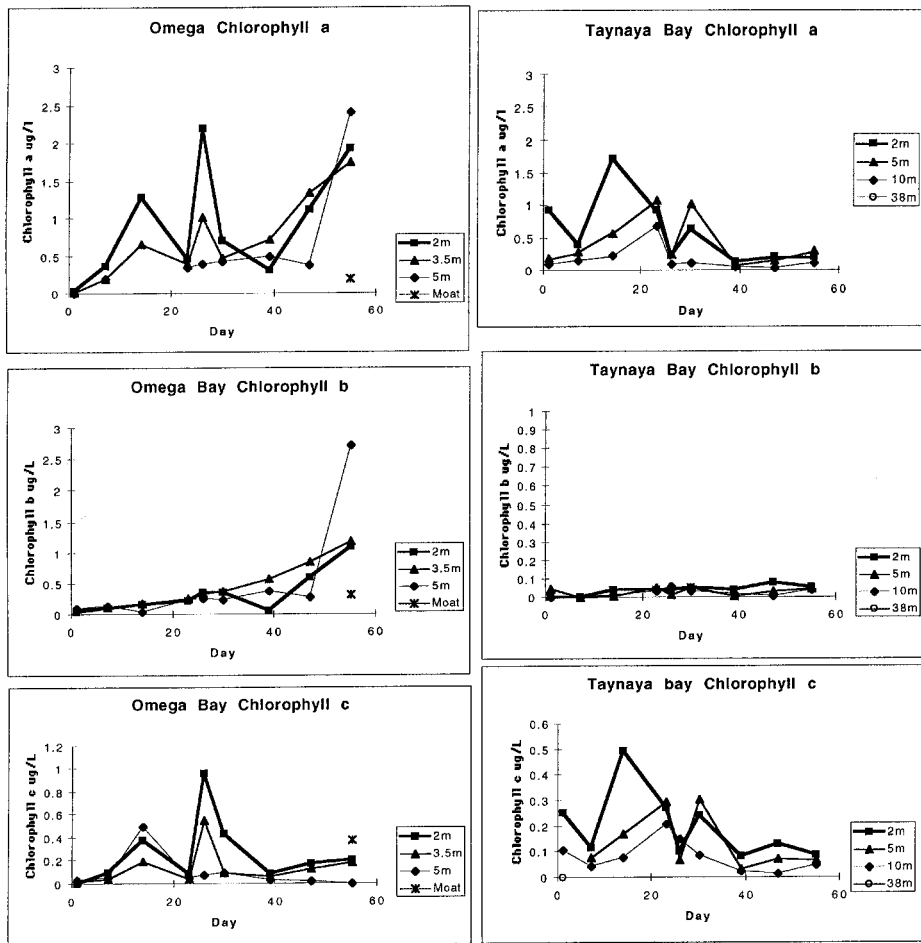

**Fig. 6.** Pigment concentration. Chlorophyll *a*, *b* and *c* concentrations at 2 m, 3.5 m and 5 m in Omega Bay and 2, 5 and 10 m in Taynaya Bay.

Diatom abundance remained approximately constant throughout the season, with maxima on 19 November ( $0.63 \times 10^9$  cells  $m^{-2}$ ), 21 December ( $0.59 \times 10^9$  cells  $m^{-2}$ ) and 21 January ( $0.50 \times 10^9$  cells  $m^{-2}$ ). The abundance of *Pyramimopsis gelidicola* peaked on 5 December ( $4.3 \times 10^9$  cells  $m^{-2}$ ) and 21 January ( $3.4 \times 10^9$  cells  $m^{-2}$ ). These correspond to unintegrated values for these dates of  $2.1 \times 10^6$  cells  $l^{-1}$  and  $1.2 \times 10^6$  cells  $l^{-1}$ . *Cryptomonas cryophila* exhibited a unimodal distribution with a peak of  $1.1 \times 10^9$  cells  $m^{-2}$  on 14 January. It did not appear in the water column until 12 December. Dinoflagellate abundance followed the general phytoplankton abundance trends with peaks on 5 December ( $0.79 \times 10^9$  cells  $m^{-2}$ ) and 6–21 January ( $0.30 \times 10^9$  cells  $m^{-2}$ ). Although *Gyrodinium* and *Protoperidinium* species were present, the dinoflagellate flora was overwhelmingly dominated by *Gymnodinium* spp.



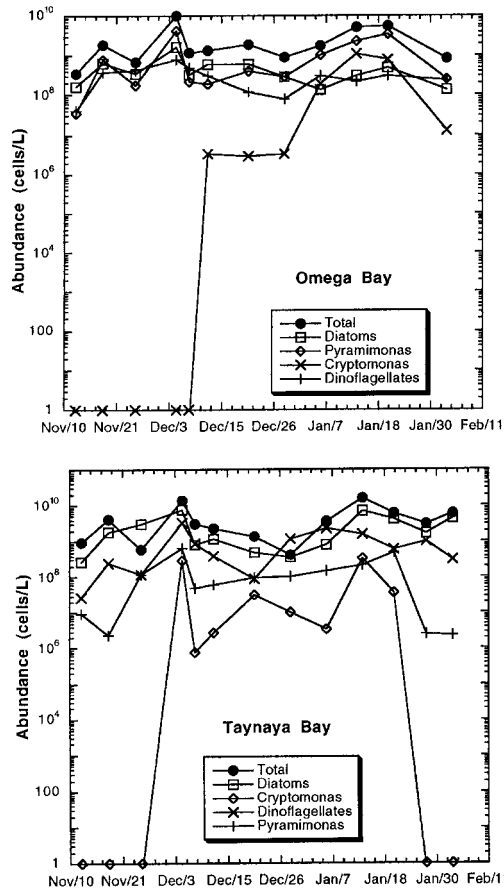

**Fig. 7.** Species composition of Omega Bay and Taynaya Bay. Abundance is presented logarithmically.

Desmids, likewise, had a bimodal distribution with peaks on 5 December ( $1.9 \times 10^9$  cells  $m^{-2}$ ) and 14 January ( $1.1 \times 10^9$  cells  $m^{-2}$ ) (Figure 7). The most abundant microheterotrophs were tintinids. Their abundance was also bimodal with peaks of  $0.36 \times 10^9$  cells  $m^{-2}$  on 5 December and  $1.1 \times 10^9$  cells  $m^{-2}$  on 14 January (Figure 8).

*Taynaya Bay.* Cell numbers from Taynaya Bay were integrated to a depth of 10 m. There were two main peaks in cell abundance, one on 5 December ( $14 \times 10^9$  cells  $m^{-2}$ ) and a second on 14 January ( $16 \times 10^9$  cells  $m^{-2}$ ). These correspond to maximum unintegrated cell abundances of  $4.2 \times 10^6$  cells  $l^{-1}$  and  $4.7 \times 10^6$  cells  $l^{-1}$  from the same dates and both from a depth of 5 m (Figure 7). Diatom abundances follow the general trends of cell abundances with maxima on 5 December and 14 January. However, phytoflagellates show different patterns of

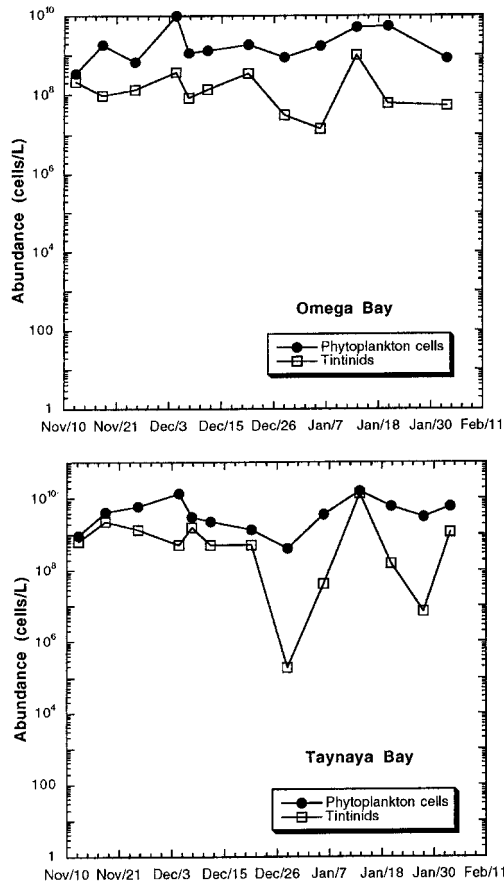

**Fig. 8.** Abundance of tintinids in Omega and Taynaya Bays. Total is the combined abundance of all protists. Abundance is presented logarithmically.

abundance. The abundance of *Pyramimonas gelidicola* rose from low values in early November, reaching an early peak ( $0.65 \times 10^9$  cells  $m^{-2}$ ) by 5 December, then declined until again peaking in abundance on 21 January ( $0.49 \times 10^9$  cells  $m^{-2}$ ). Unlike diatoms and *Pyramimonas*, *Cryptomonas cryophila* was completely absent until 12 December. Its abundance peaked on 14 January ( $0.34 \times 10^9$  cells  $m^{-2}$ ) but had disappeared by 28 January.

Dinoflagellates, predominantly *Gymnodinium* spp., showed a similar distribution pattern to diatoms. They peaked in abundance on 5 December ( $3.4 \times 10^9$  cells  $m^{-2}$ ), declined, and then peaked again ( $2.3 \times 10^9$  cells  $m^{-2}$ ) on 6 January (Figure 7).

Tintinids, the dominant microheterotrophs, reached peak abundance ( $14 \times 10^9$  cells  $m^{-2}$ ) on 14 January (Figure 8).

*Diatom distribution*

The diatom flora has been further differentiated into species (Table I).

*Omega Bay.* The seasonal distribution of diatoms is dominated by the release of ice-associated diatoms into the water column in early December. Dominant species include the ice-associated taxa *Berkelaya adeliense*, *Nitzschia stellata* and *Thalassiosira australis*. *Navicula glaciei* is also most abundant during this time, sometimes forming an almost monospecific bloom, but it is also present in large numbers both before and after the ice melt. *Fragilariopsis cylindrus* is the most abundant diatom prior to ice melt in November, while *F.curta* co-dominates with *N.glaciei* afterwards.

*Taynaya Bay.* As in Omega Bay, the seasonal distribution of diatoms is dominated by the release of ice-associated diatoms from the ice into the water column in early December. Species which show this distribution include *B.adeliense*, *N.glaciei*, *T.australis*, *N.stellata* and *N.lecointei*. *Fragilariopsis cylindrus* also peaks in abundance in early December but is abundant both before and after the peaks of other ice-associated diatoms. Its abundance is probably not solely related to release from the ice. *Fragilariopsis curta* is uncommon early in the season but is the dominant species in January and February.

**Discussion**

Both Omega and Taynana Bays had a similar bimodal phytoplankton distribution. In the early part of the season, i.e. November to early December, light levels were low as a consequence of the sea ice cover, the water column was mostly well mixed and nutrient concentrations were uniformly high. Much of the phytoplankton was in the form of diatoms contributed from the melting and break-up of the sea ice. The melting of the sea ice and the increasing temperatures caused the water column in both bays to become increasingly stratified from this time onwards. Nutrient levels also declined from early season highs to minima at the end of summer. The second phytoplankton bloom coincided with increasing stratification but decreasing nutrient levels. In Omega Bay this bloom was characterized by blooms of phytoflagellates, in particular *Pyramimonas gelidicola*, *Cryptomonas cryophila* and *Gymnodinium* sp. In Taynaya Bay these taxa became increasingly abundant but the community was still dominated by diatoms, in particular *Fragilariopsis curta* and *Navicula glaciei*. This difference is reflected in the pigment analysis, which shows a strong late season development of chlorophyll *b* concentrations in Omega Bay but not Taynaya Bay, indicating the presence of the prasinophyte, *Pyramimonas*.

Prior to the ice melting, the most abundant diatom species in both bays were *Fragilariopsis cylindrus* and *Navicula glaciei*; however, after 6 January, these species were replaced by *F.curta*. Each of these species is strongly related to sea ice communities (McMinn, 1996, 1998), but *F.curta* is also associated with reduced salinities resulting from ice melt (Leventer, 1998). Its abundance in both bays

**Table 1.** Seasonal diatom abundance (%)

|                                 | Date (depth in m) |     |           |    |           |    |          |     |          |    |           |    |           |     |           |    |          |    |           |     |           |     |          |     |    |    |
|---------------------------------|-------------------|-----|-----------|----|-----------|----|----------|-----|----------|----|-----------|----|-----------|-----|-----------|----|----------|----|-----------|-----|-----------|-----|----------|-----|----|----|
|                                 | 13 Nov 97         |     | 19 Nov 97 |    | 26 Nov 97 |    | 5 Dec 97 |     | 8 Dec 97 |    | 12 Dec 97 |    | 21 Dec 97 |     | 29 Dec 97 |    | 6 Jan 98 |    | 14 Jan 98 |     | 28 Jan 98 |     | 3 Feb 98 |     |    |    |
|                                 | 2                 | 3.5 | 5         | 2  | 3.5       | 5  | 2        | 3.5 | 5        | 2  | 3.5       | 5  | 2         | 3.5 | 5         | 2  | 3.5      | 5  | 2         | 3.5 | 2         | 3.5 | 2        | 3.5 | 2  |    |
| <b>Omega Bay diatoms</b>        |                   |     |           |    |           |    |          |     |          |    |           |    |           |     |           |    |          |    |           |     |           |     |          |     |    |    |
| <i>Achnanthes</i> spp.          | 0                 | 0   | 0         | 0  | 0         | 0  | 0        | 0   | 0        | 0  | 0         | 0  | 0         | 0   | 0         | 0  | 0        | 0  | 0         | 0   | 0         | 0   | 0        | 0   | 0  | 0  |
| <i>Berkelaya adalense</i>       | 0                 | 0   | 0         | 0  | 0         | 0  | 0        | 0   | 0        | 0  | 0         | 0  | 0         | 0   | 0         | 0  | 0        | 0  | 0         | 0   | 0         | 0   | 0        | 0   | 0  | 0  |
| <i>Chaetoceros</i> spp.         | 0                 | 0   | 2         | 0  | 0         | 0  | 0        | 0   | 0        | 0  | 0         | 0  | 0         | 0   | 0         | 0  | 0        | 0  | 0         | 0   | 0         | 0   | 0        | 0   | 0  | 0  |
| <i>Cocconeis</i> spp.           | 2                 | 1   | 0         | 0  | 0         | 0  | 0        | 0   | 0        | 0  | 0         | 0  | 0         | 0   | 0         | 0  | 0        | 0  | 0         | 0   | 0         | 0   | 0        | 0   | 0  | 0  |
| <i>Cylindrotheca closterium</i> | 0                 | 0   | 0         | 0  | 0         | 0  | 0        | 0   | 0        | 0  | 0         | 0  | 0         | 0   | 0         | 0  | 0        | 0  | 0         | 0   | 0         | 0   | 0        | 0   | 0  | 0  |
| <i>Entomoneis kjellmannii</i>   | 0                 | 0   | 0         | 0  | 0         | 0  | 0        | 0   | 0        | 0  | 0         | 0  | 0         | 0   | 0         | 0  | 0        | 0  | 0         | 0   | 0         | 0   | 0        | 0   | 0  | 0  |
| <i>Eucampia antarctica</i>      | 1                 | 0   | 0         | 0  | 0         | 0  | 0        | 0   | 0        | 0  | 0         | 0  | 0         | 0   | 0         | 0  | 0        | 0  | 0         | 0   | 0         | 0   | 0        | 0   | 0  | 0  |
| <i>Fragilaria</i> spp.          | 1                 | 0   | 0         | 0  | 0         | 0  | 0        | 0   | 0        | 0  | 0         | 0  | 0         | 0   | 0         | 0  | 0        | 0  | 0         | 0   | 0         | 0   | 0        | 0   | 0  | 0  |
| <i>Fragilariopsis cylindrus</i> | 10                | 28  | 41        | 3  | 3         | 3  | 8        | 0   | 5        | 0  | 2         | 1  | 1         | 5   | 1         | 1  | 0        | 0  | 0         | 0   | 0         | 0   | 0        | 0   | 0  | 0  |
| <i>Fragilariopsis curta</i>     | 3                 | 2   | 0         | 0  | 2         | 0  | 0        | 0   | 5        | 1  | 0         | 0  | 0         | 0   | 0         | 0  | 0        | 0  | 0         | 0   | 0         | 0   | 0        | 0   | 0  | 0  |
| <i>Navicula directa</i>         | 2                 | 0   | 0         | 0  | 0         | 0  | 0        | 0   | 0        | 0  | 0         | 0  | 0         | 0   | 0         | 0  | 0        | 0  | 0         | 0   | 0         | 0   | 0        | 0   | 0  | 0  |
| <i>Navicula glacialis</i>       | 48                | 23  | 48        | 23 | 42        | 37 | 19       | 41  | 41       | 67 | 82        | 94 | 86        | 90  | 97        | 86 | 89       | 74 | 100       | 95  | 85        | 83  | 74       | 85  | 83 | 74 |
| <i>Navicula</i> spp.            | 26                | 38  | 3         | 6  | 0         | 0  | 10       | 2   | 1        | 6  | 4         | 1  | 0         | 3   | 1         | 1  | 3        | 0  | 0         | 3   | 0         | 0   | 2        | 0   | 0  | 4  |
| <i>Nitzschia lecontei</i>       | 0                 | 2   | 0         | 0  | 0         | 0  | 13       | 0   | 0        | 5  | 1         | 3  | 2         | 0   | 0         | 4  | 1        | 8  | 0         | 1   | 3         | 0   | 0        | 0   | 0  | 0  |
| <i>Nitzschia sellata</i>        | 4                 | 4   | 6         | 67 | 52        | 60 | 24       | 57  | 7        | 8  | 3         | 2  | 8         | 0   | 2         | 0  | 3        | 0  | 0         | 2   | 2         | 3   | 0        | 2   | 2  | 2  |
| <i>Nitzschia subcurvata</i>     | 0                 | 0   | 0         | 0  | 0         | 0  | 0        | 0   | 0        | 0  | 0         | 0  | 0         | 0   | 0         | 0  | 0        | 1  | 0         | 0   | 0         | 0   | 0        | 0   | 0  | 0  |
| <i>Nitzschia tenuiformis</i>    | 0                 | 0   | 0         | 0  | 0         | 0  | 0        | 0   | 0        | 0  | 0         | 0  | 0         | 0   | 0         | 0  | 0        | 10 | 0         | 0   | 0         | 0   | 1        | 0   | 0  | 0  |
| <i>Pinnularia quadratea</i>     | 0                 | 0   | 0         | 0  | 0         | 0  | 0        | 0   | 0        | 0  | 0         | 0  | 0         | 0   | 0         | 0  | 0        | 0  | 0         | 0   | 0         | 0   | 0        | 0   | 0  | 0  |
| <i>Porosira</i> spp.            | 0                 | 0   | 0         | 0  | 0         | 0  | 0        | 0   | 0        | 0  | 0         | 0  | 0         | 0   | 0         | 0  | 0        | 0  | 0         | 0   | 0         | 0   | 0        | 0   | 0  | 0  |
| <i>Stauroneis</i> spp.          | 2                 | 0   | 0         | 0  | 0         | 0  | 0        | 0   | 0        | 0  | 0         | 0  | 0         | 0   | 0         | 0  | 0        | 0  | 0         | 0   | 0         | 0   | 0        | 0   | 0  | 0  |
| <i>Stauroneis</i> sp.           | 0                 | 0   | 0         | 0  | 0         | 0  | 0        | 0   | 0        | 0  | 0         | 0  | 0         | 0   | 0         | 0  | 0        | 0  | 0         | 0   | 0         | 0   | 0        | 0   | 0  | 0  |
| <i>Synedra</i> spp.             | 0                 | 0   | 0         | 0  | 0         | 0  | 0        | 0   | 0        | 0  | 0         | 0  | 0         | 0   | 0         | 0  | 0        | 0  | 0         | 0   | 0         | 0   | 0        | 0   | 0  | 0  |
| <i>Synedra</i> sp.              | 0                 | 0   | 0         | 0  | 0         | 0  | 0        | 0   | 0        | 0  | 0         | 0  | 0         | 0   | 0         | 0  | 0        | 0  | 0         | 0   | 0         | 0   | 0        | 0   | 0  | 0  |
| <i>Thalassiosira ambigua</i>    | 0                 | 0   | 0         | 0  | 0         | 0  | 0        | 0   | 0        | 0  | 0         | 0  | 0         | 0   | 0         | 0  | 0        | 0  | 0         | 0   | 0         | 0   | 0        | 0   | 0  | 0  |
| <i>Thalassiosira australis</i>  | 0                 | 0   | 0         | 0  | 0         | 0  | 0        | 0   | 0        | 0  | 0         | 0  | 0         | 0   | 0         | 0  | 0        | 0  | 0         | 0   | 0         | 0   | 0        | 0   | 0  | 0  |
| <i>Thalassiosira gracilis</i>   | 0                 | 0   | 0         | 0  | 0         | 0  | 0        | 0   | 0        | 0  | 0         | 0  | 0         | 0   | 0         | 0  | 0        | 0  | 0         | 0   | 0         | 0   | 0        | 0   | 0  | 0  |
| <i>Thalassiosira gravida</i>    | 0                 | 0   | 0         | 0  | 0         | 0  | 0        | 0   | 0        | 0  | 0         | 0  | 0         | 0   | 0         | 0  | 0        | 0  | 0         | 0   | 0         | 0   | 0        | 0   | 0  | 0  |

Table 1. continued

|                                        | 13 Nov 97 |    | 19 Nov 97 |    | 26 Nov 97 |    | 5 Dec 97 |    | 8 Dec 97 |    | 12 Dec 97 |    | 21 Dec 97 |    | 29 Dec 97 |    | 6 Jan 98 |    | 14 Jan 98 |    | 28 Jan 98 |    | 3 Feb 98 |    |    |    |   |
|----------------------------------------|-----------|----|-----------|----|-----------|----|----------|----|----------|----|-----------|----|-----------|----|-----------|----|----------|----|-----------|----|-----------|----|----------|----|----|----|---|
|                                        | 38        | 5  | 10        | 5  | 10        | 2  | 5        | 10 | 2        | 5  | 10        | 2  | 5         | 10 | 2         | 5  | 10       | 2  | 5         | 10 | 2         | 5  | 10       | 2  |    |    |   |
| <b>Taymyra Bay diatoms</b>             |           |    |           |    |           |    |          |    |          |    |           |    |           |    |           |    |          |    |           |    |           |    |          |    |    |    |   |
| <i>Achnanthes</i> spp.                 | 0         | 0  | 0         | 0  | 0         | 0  | 0        | 0  | 0        | 0  | 0         | 0  | 0         | 0  | 0         | 0  | 0        | 0  | 0         | 0  | 0         | 0  | 0        | 0  |    |    |   |
| <i>Berkelaya adeltense</i>             | 0         | 0  | 0         | 0  | 0         | 0  | 0        | 0  | 0        | 0  | 0         | 0  | 0         | 0  | 0         | 0  | 0        | 0  | 0         | 0  | 0         | 0  | 0        | 0  |    |    |   |
| <i>Fragilaropsis curta</i>             | 0         | 4  | 8         | 0  | 2         | 3  | 2        | 0  | 1        | 2  | 2         | 12 | 4         | 3  | 2         | 41 | 39       | 73 | 49        | 44 | 60        | 88 | 60       | 93 | 75 | 93 |   |
| <i>Fragilaropsis cylindrus</i>         | 47        | 80 | 45        | 8  | 42        | 60 | 13       | 22 | 40       | 16 | 55        | 49 | 13        | 23 | 48        | 19 | 38       | 7  | 23        | 23 | 11        | 6  | 36       | 1  | 6  | 4  |   |
| <i>Navicula glaciei</i>                | 5         | 4  | 2         | 5  | 15        | 5  | 14       | 12 | 10       | 27 | 11        | 5  | 7         | 23 | 10        | 21 | 10       | 8  | 9         | 17 | 8         | 1  | 0        | 1  | 0  | 0  |   |
| <i>Nitzschia cloisterium</i>           | 0         | 0  | 1         | 9  | 1         | 0  | 1        | 1  | 1        | 1  | 1         | 6  | 2         | 0  | 1         | 2  | 1        | 0  | 2         | 1  | 0         | 0  | 0        | 0  | 0  | 0  |   |
| <i>Nitzschia polaris/neglecta</i>      | 2         | 0  | 0         | 0  | 0         | 0  | 0        | 0  | 0        | 1  | 1         | 1  | 1         | 0  | 0         | 0  | 0        | 1  | 0         | 0  | 0         | 0  | 0        | 0  | 0  | 0  |   |
| <i>Nitzschia stellata</i>              | 2         | 0  | 1         | 1  | 0         | 0  | 2        | 1  | 1        | 0  | 0         | 1  | 1         | 1  | 2         | 1  | 0        | 0  | 0         | 0  | 0         | 0  | 0        | 0  | 0  | 0  |   |
| <i>Nitzschia lecontei</i>              | 18        | 1  | 18        | 24 | 15        | 9  | 4        | 9  | 14       | 7  | 27        | 15 | 1         | 32 | 35        | 29 | 8        | 0  | 5         | 9  | 2         | 8  | 1        | 1  | 0  | 0  | 0 |
| <i>Nitzschia delicatissima?</i>        | 0         | 0  | 0         | 0  | 0         | 0  | 0        | 0  | 0        | 0  | 0         | 0  | 0         | 0  | 0         | 0  | 0        | 0  | 2         | 1  | 0         | 0  | 0        | 0  | 0  | 0  |   |
| <i>Nitzschia subcurvata</i>            | 0         | 0  | 2         | 3  | 2         | 0  | 0        | 1  | 0        | 0  | 1         | 1  | 1         | 1  | 1         | 0  | 0        | 0  | 0         | 0  | 0         | 0  | 1        | 3  | 0  | 0  |   |
| <i>Nitzschia teaniformis</i>           | 0         | 2  | 0         | 0  | 0         | 0  | 1        | 1  | 0        | 0  | 0         | 0  | 0         | 0  | 0         | 0  | 0        | 0  | 0         | 0  | 0         | 0  | 0        | 0  | 0  | 0  |   |
| <i>Pinnularia quadratarea capitata</i> | 2         | 0  | 0         | 0  | 0         | 0  | 0        | 0  | 0        | 0  | 0         | 1  | 1         | 0  | 0         | 0  | 0        | 0  | 0         | 0  | 0         | 0  | 0        | 0  | 0  | 0  |   |
| <i>Pseudonitzschia lineola</i>         | 2         | 0  | 5         | 7  | 1         | 1  | 0        | 0  | 0        | 0  | 0         | 0  | 0         | 1  | 0         | 2  | 0        | 0  | 0         | 0  | 0         | 0  | 0        | 0  | 0  | 0  |   |
| <i>Pseudonitzschia prolongatoides</i>  | 3         | 9  | 1         | 5  | 0         | 0  | 2        | 2  | 4        | 0  | 2         | 1  | 7         | 7  | 4         | 3  | 5        | 3  | 0         | 1  | 2         | 2  | 0        | 0  | 1  | 0  |   |
| <i>Pseudonitzschia argulicoides</i>    | 0         | 0  | 4         | 1  | 0         | 0  | 0        | 0  | 0        | 1  | 1         | 1  | 1         | 0  | 0         | 0  | 0        | 0  | 0         | 0  | 0         | 0  | 0        | 0  | 0  | 0  |   |
| <i>Thalassiosira ambigua</i>           | 0         | 0  | 0         | 0  | 0         | 0  | 0        | 0  | 0        | 0  | 0         | 0  | 0         | 0  | 0         | 0  | 0        | 0  | 0         | 0  | 0         | 0  | 0        | 0  | 0  | 0  |   |
| <i>Thalassiosira australis</i>         | 0         | 0  | 0         | 0  | 0         | 0  | 0        | 0  | 0        | 0  | 0         | 0  | 0         | 0  | 0         | 0  | 0        | 0  | 0         | 0  | 0         | 0  | 0        | 0  | 0  | 0  |   |
| <i>Thalassiosira diatomica</i>         | 0         | 0  | 0         | 0  | 0         | 0  | 0        | 0  | 0        | 0  | 0         | 0  | 0         | 0  | 0         | 0  | 0        | 0  | 0         | 0  | 0         | 0  | 0        | 0  | 0  | 0  |   |
| <i>Synedropsis cf hyperborea?</i>      | 0         | 0  | 0         | 0  | 0         | 0  | 0        | 0  | 0        | 0  | 0         | 0  | 0         | 0  | 0         | 0  | 0        | 0  | 0         | 0  | 0         | 0  | 0        | 0  | 0  | 0  |   |
| <i>Synedra</i> spp.                    | 0         | 0  | 0         | 0  | 0         | 0  | 0        | 0  | 0        | 0  | 0         | 0  | 0         | 0  | 0         | 0  | 0        | 0  | 0         | 0  | 0         | 0  | 0        | 0  | 0  | 0  |   |

suggests that it is responding to meltwater-induced stratification and not to changing light levels.

All nutrients show strong depletion over the summer (Figure 4). However, the relative depletion rates indicate that at times, different processes are operating in the two bays. Redfield *et al.* noted that growing phytoplankton take up nutrients from the water column in fixed proportions and proposed C:N:P:Si ratios of 106:16:1:15 (Redfield *et al.*, 1963). Jennings *et al.*, however, suggested a more appropriate ratio for the Southern Ocean would be 62:11:1:24 (Jennings *et al.*, 1984).

Initial N:P ratios in Omega Bay were between 2 and 4 and in Taynaya Bay, ~12; those from Omega Bay were well below the 11 nominated for normal phytoplankton growth (Jennings *et al.*, 1984) while those from Taynaya Bay were quite close. Unlike N:P ratios, N:Si ratios are far more variable as they depend on the abundance of diatoms which can show both temporal and spatial variations. The N:Si ratios from Omega Bay were relatively high, in the range 0.8 to 1.4, while those from Taynaya Bay were lower, initially ~0.5 but dropping to 0.05 later in the season. These compare with a suggested normal values of 0.45 (Jennings *et al.*, 1984) or 1.07 (Redfield *et al.*, 1963), and field measurements at nearby Ellis Fjord of 0.56 (McMinn *et al.*, 1995).

These ratios indicate that N was usually the limiting nutrient in Omega Bay, although minor occurrences of Si limitation may have occurred early and late in the season. The general trend of N limitation is further reinforced by the trend lines in the whole nutrient dataset (Figure 9), which show residual Si and P when all the N has been used.

Initial nitrate levels were considerably higher in Taynaya Bay than in Omega Bay and initial N:P ratios were mostly between 10 and 14, suggesting that the phytoplankton were not initially strongly limited by either of these two nutrients. The initial N:Si ratios of ~0.40 are low. However, both the N:P and N:Si ratios drop sharply after 6 January and this implies N limitation after this date. As with Omega Bay, trends in the whole nutrient dataset show residual Si and P when the N has been exhausted, indicating that N is usually the limiting nutrient (Figure 9).

Sommer (1986) reported that many Antarctic diatoms had a particularly strong affinity for silica and that consequently, silica concentrations as low as 80  $\text{mmol m}^{-3}$  could effect growth (Sommer, 1986). Of the species he documented, only *Fragilariopsis cylindrus* is common in the fjord environments examined here. However, he recorded a silica half saturation constant of 8.4 and a nitrate half saturation constant of 4.2 for this species. Of the nutrient concentrations recorded in both fjords, nitrate is consistently below levels necessary to avoid growth limitation from early January onwards. Silicate levels in Omega Bay are mostly above 30  $\text{mmol m}^{-3}$  and are therefore at levels unlikely to cause serious limitation. Lower silicate concentrations in Taynaya Bay, however, could lead to minor limitation. Iron limitation affects nitrate uptake (Dohler, 1992; Timmermans *et al.*, 1994) and this could possibly have contributed to the decrease in the N:Si ratios observed here. However, elsewhere around Antarctica, iron has not been found to be limiting in near shore marine environments (Helbling *et al.*, 1991).

There was a small mid-season rise in nutrient concentrations at both sites

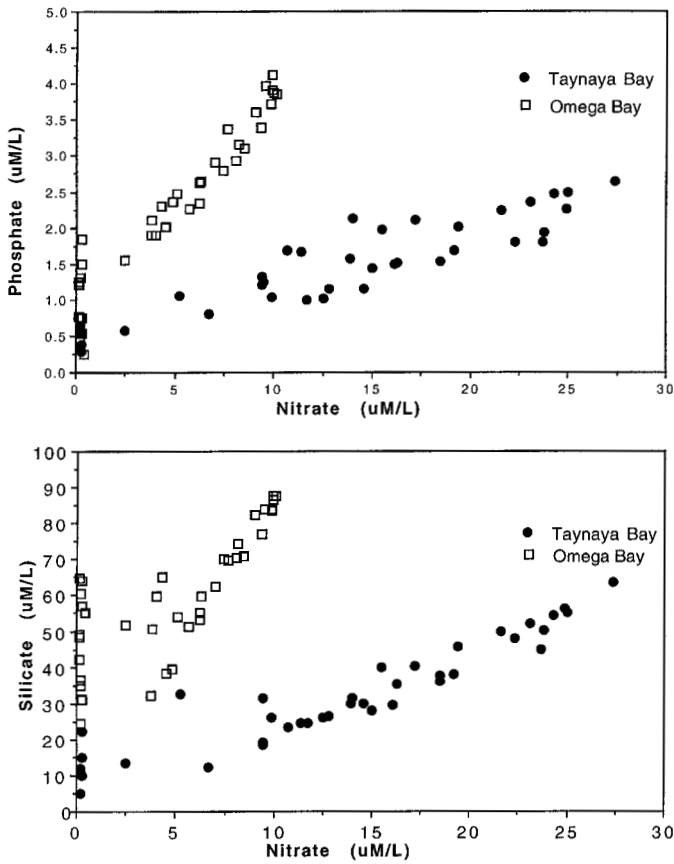

**Fig. 9.** N versus P and N versus Si plots of complete nutrient dataset for Omega and Taynaya Bays.

(Figure 5). This occurrence approximately coincided with a peak in tintinid numbers, which is possibly associated with remineralization resulting from increased microheterotroph activity. However, measurement of bacterial numbers and ammonium concentration would be necessary to validate this suggestion. While ammonium concentration was not measured, it is likely that it became an increasingly important source of N throughout the season. Priddle *et al.* have even suggested that Southern Ocean phytoplankton production is primarily dependant on ammonium rather than nitrate as a nitrogen source (Priddle *et al.*, 1997). Recent evidence suggests that at low temperatures, phytoplankton have a decreased affinity for nitrate but not ammonium, and this would result in an increasing dependence on ammonium as a nitrogen source (Reay *et al.*, 1999).

Despite both bays exhibiting different salinities, nutrient concentrations and light environments (i.e. ice cover), the taxonomic composition of the two communities was surprisingly similar. There were, however, a number of important differences. Early season communities in both bays were almost identical,

being strongly influenced by the overlying sea ice algal mats. However, after 6 January in Omega Bay, *Cryptomonas* sp., *Pyramimonas gelidicola* and *Gymnodinium* spp. bloom and become more abundant than diatoms. While these taxa are also common in Taynaya Bay, they are never more abundant than diatoms.

Little is known about the light requirements of the principal phytoflagellates found in the two bays. However, it is well established that most ice-associated diatoms are extremely shade adapted (Palmisano *et al.*, 1985; Grossi *et al.*, 1987). Light levels beneath the fast ice between October and December are typically  $<10 \mu\text{M photons m}^{-2} \text{ s}^{-1}$  (McMinn and Ashworth, 1998). Photoadaptive index values ( $E_k$ ) of between 10 and  $20 \mu\text{M photons m}^{-2} \text{ s}^{-1}$  are characteristic of diatom species associated with the bottom ice community (Palmisano *et al.*, 1985; McMinn and Ashworth, 1998), while values between 37 and  $42 \mu\text{M photons m}^{-2} \text{ s}^{-1}$  were reported for a *Navicula glaciei* dominated community (Robinson *et al.*, 1997). Weddell Sea diatom-dominated pack ice communities had average  $E_k$  values of  $60 \mu\text{M photons m}^{-2} \text{ s}^{-1}$  (Gleitz and Kirst, 1991). It seems likely that the shift from a diatom to a phytoflagellate-dominated phytoplankton community that has also been reported from both Ellis Fjord (McMinn and Hodgson, 1993) and from Davis (Perrin and Marchant, 1987), resulted, at least in part, from the increased light levels once the ice had broken out.

The effect of the differing salinities between the two bays on the phytoplankton succession is difficult to gauge. Initially, the salinities were quite different while the community structure was quite similar. Later in the season, the melting ice and increasing stratification led to reduced surface salinities in both bays. However, surface salinities in Omega Bay dropped to as low as 25.7 pss while those in Taynaya Bay remained at or above 32.0 pss. Ice-related diatoms, such as *F.curta*, are known to be able to adapt to changing salinities (Vargo *et al.*, 1986; Arrigo and Sullivan, 1992) but the response of the phytoflagellates is unknown.

It is possible that ice cover alone accounts for the difference in species successions between the two bays. However, it is likely that differing nutrient status and salinities between the two bays also played a significant role.

### Acknowledgements

We would like to acknowledge financial support from ASAC and logistical and field support from the Australian Antarctic Division. We would also like to thank Neale Johnston for his help with nutrient analyses.

### References

- Alpkem (1992) *Alpkem Methodology Manual, the Flow Solution*. Alpkem Corporation, Wilsonville, Oregon.
- Arrigo, K.R. and Sullivan, C.W. (1992) The influence of salinity and temperature covariation on the photophysiological characteristics of Antarctic sea ice microalgae. *J. Phycol.*, **28**, 746–756.
- Dohler, G. (1992) Impact of UV-B radiation on uptake of  $^{15}\text{N}$ -ammonia and  $^{15}\text{N}$ -nitrate by phytoplankton of the Wadden Sea. *Mar. Biol.*, **112**, 485–489.
- Gleitz, M. and Kirst, G.O. (1991) Photosynthesis-irradiance relationships and carbon metabolism of different ice algal assemblages collected from Weddell Sea pack ice during austral spring (EPOS 1). *Polar Biol.*, **11**, 385–392.



- Grossi,S.M., Kottmeier,S.T., Moe,R.L., Taylor,G.T. and Sullivan,C.W. (1987) Sea ice microbial communities. VI. Growth and primary production in bottom ice under graded snow cover. *Mar. Ecol. Prog. Ser.*, **35**, 153–164.
- Helbling,E.W., Villafane,V. and Holm-Hansen,O. (1991) Effect of iron on productivity and size distribution of Antarctic phytoplankton. *Limnol. Oceanogr.*, **36**, 1879–1885.
- Jennings,J.C., Gordon,L.I. and Nelson,D.M. (1984) Nutrient depletion indicates high productivity in the Weddell Sea. *Nature*, **309**, 51–54.
- Knox,G.A. (1994) *The Biology of the Southern Ocean*. Cambridge University Press, Cambridge.
- Leventer,A. (1998). The fate of Antarctic 'sea ice diatoms' and their use as paleoenvironmental indicators. In Lizotte,M. and Arrigo,K. (eds) *Antarctic Sea Ice Biological Processes, Interactions and Variability*. Antarctic Research Series **73**, pp. 121–137.
- Martin,J.H., Gordon,R.M. and Fitzwater,S.E. (1990) Iron in Antarctic waters. *Nature*, **345**, 156–158.
- McMinn,A. (1996) Preliminary investigation of the contribution of fast ice algae to the spring phytoplankton bloom in Ellis Fjord, eastern Antarctica. *Polar Biol.*, **16**, 301–307.
- McMinn,A. (1998) Species succession in fast ice algal communities; a response to UV-B radiation? *Korean J. Polar Res.*, **8**, 47–52.
- McMinn,A. and Ashworth,C. (1998) The use of oxygen microelectrodes to determine the net production by an Antarctic sea ice algal community. *Antarctic Sci.*, **10**, 30–35.
- McMinn,A., and Hodgson,D. (1993) Seasonal phytoplankton succession in Ellis Fjord, eastern Antarctica. *J. Plankton Res.*, **15**, 925–938.
- McMinn,A., Heijnis,H. and Hodgson,D. (1994) Minimal effects of UV-B on Antarctic diatoms over the past 20 years. *Nature*, **370**, 547–549.
- McMinn,A., Gibson,J., Hodgson,D. and Aschman,J. (1995) Nutrient limitation in Ellis Fjord, Antarctica. *Polar Biol.*, **15**, 269–276.
- McMinn,A., Heijnis,H. and Hodgson,D. (1997) Preliminary sediment core evidence against short-term, UV-B induced changes in Antarctic coastal diatom communities. In Battaglia,B., Valencia,J. and Walton,D.W.H. (eds) *Antarctic Communities: Species, Structure and Survival*. Cambridge University Press, Cambridge, pp. 381–387.
- Nelson,D.M. and Smith,W.O.,Jr (1986) Phytoplankton bloom dynamics of the western Ross Sea ice edge. II Mesoscale cycling of nitrogen and silica. *Deep-Sea Res.*, **33**, 1389–1412.
- Nelson,D.M. and Smith,W.O.,Jr (1991) Sverdrup revisited: Critical depths, maximum chlorophyll levels, and the control of Southern Ocean productivity by the irradiance-mixing regime. *Limnol. Oceanogr.*, **36**, 1650–1661.
- Nelson,D.M., Smith,W.O.,Jr, Gordon,L.I. and Huber,B.A. (1987) Spring distributions of density, nutrients, and phytoplankton biomass at the ice edge of the Weddell Sea. *J. Geophys. Res.*, **92**, 7181–7190.
- Palmisano,A.C., SooHoo,J.B. and Sullivan,C.W. (1985) Photosynthetic-irradiance relationships in sea ice microalgae from McMurdo Sound, Antarctica. *J. Phycol.*, **21**, 341–346.
- Perrin,R.A. and Marchant,H.J. (1987) Seasonal variation in marine phytoplankton and ice algae at a shallow Antarctic coastal site. *Hydrobiologia*, **146**, 293–304.
- Priddle,J., Whitehouse,M.J., Atkinson,A., Brierly,A.S. and Murphy,E.J. (1997) Diurnal changes in near-surface ammonium concentration – interplay between zooplankton and phytoplankton. *J. Plankton Res.*, **19**, 1305–1330.
- Reay,D.S., Nedwell,D.B., Priddle,J. and Ellis-Evans,J.C. (1999) Temperature dependence of inorganic nitrogen uptake: reduced affinity for nitrate at suboptimal temperatures in both algae and bacteria. *Appl. Environ. Microbiol.*, **65**, 2577–2584.
- Redfield,A.C., Ketchum,B. and Richards,F.A. (1963) The influence of organisms on the composition of seawater. In Hill,M.N. (ed.) *The Sea*. Wiley-Interscience, New York, Vol. 2, pp. 26–77.
- Robinson,D.H., Kolber,Z. and Sullivan,C.W. (1997) Photophysiology and photoacclimation in surface sea ice algae from McMurdo Sound, Antarctica. *Mar. Ecol. Prog. Ser.*, **147**, 243–256.
- Sommer,L. (1986) Nitrate and silicate competition among Antarctic phytoplankton. *Mar. Biol.*, **91**, 345–351.
- Strickland,J.D.H. and Parsons,T.R. (1972) *A Practical Handbook of Seawater Analysis*, 2nd edition. Bulletin of the Fisheries Research Board of Canada, **167**.
- Timmermans,K.R., Stolte,W. and de Baar,H.J.W. (1994) Iron-mediated effects on nitrate reductase in marine phytoplankton. *Mar. Biol.*, **121**, 389–396.
- Vargo,G.A., Fanning,K. and Bell,L. (1986) Growth rates and salinity responses of an Antarctic ice microflora community. *Polar Biol.*, **5**, 241–247.

Received on March 29, 1999; accepted on August 26, 1999
